# Supplementary material
Source: HighWire-hosted journal article supplement (https://www.rcpjournals.org/highwire/filestream/12052/field_highwire_adjunct_files/0/Zhang_supplementary_material_S1.pdf)
Supplement: Zhang_supplementary_material_S1.pdf [file Zhang_supplementary_material_S1.pdf]

# Supplementary material S1.

## Comparison of St George's cohort with HERMES & MR.CLEAN registry

|                                                 | HERMES        | MR CLEAN          | Our Study            |
|-------------------------------------------------|---------------|-------------------|----------------------|
| <b>Number of patients</b>                       | 634           | 1488 <sup>†</sup> | <b>374</b>           |
| <b>Median age (y) (IQR)</b>                     | 68 (57-77)    | 71.2 (69-80)      | <b>67 (58-79)</b>    |
| <b>Male (%)</b>                                 | 52            | 53.3              | <b>50.5</b>          |
| <b>Pre-stroke mRS (0-1) (%)</b>                 | 95.0          | 79.4              | <b>84.2</b>          |
| <b>Past medical history (%)</b>                 |               |                   |                      |
| Hypertension                                    | 55.5          | 50.2              | <b>53.7</b>          |
| Diabetes                                        | 12.9          | 17.2              | <b>14.7</b>          |
| Atrial fibrillation                             | 32.9          | 22.3              | <b>37.2</b>          |
| <b>Median NIHSS on admission (IQR)</b>          | 17 (14-20)    | 16 (11-20)        | <b>18 (12-21)</b>    |
| <b>Site of arterial occlusion (%)</b>           |               |                   |                      |
| Intracranial ICA                                | 20.9          | 22.1              | <b>24.9</b>          |
| MCA M1                                          | 69.2          | 58.4              | <b>57.0</b>          |
| Extracranial tandem occlusion                   | 9.6           | -                 | <b>18.7</b>          |
| <b>Intravenous thrombolysis (%)</b>             | 82.9          | 78.0              | <b>75.7</b>          |
| <b>Median Process time (min) (IQR)</b>          |               |                   |                      |
| Symptom-arterial puncture                       | 238 (180-302) | 208 (160-265)     | <b>255 (195-306)</b> |
| Symptom-recanalization                          | 285 (210-362) | 260 (209-314)     | <b>339 (234-337)</b> |
| <b>Successful recanalization mTICI 2b/3 (%)</b> | 70.5*         | 58.7              | <b>77.3**</b>        |
| <b>Clinical outcome (%)</b>                     |               |                   |                      |
| Good functional outcome mRS (0-2)               | 46            | 37.9              | <b>43.3</b>          |
| <b>Mortality</b>                                | 15.3          | 29                | <b>17.9</b>          |
| <b>sICH</b>                                     | 4.4           | 5.8               | <b>1.9</b>           |

ICA = internal carotid artery; IQR = interquartile range; MCA = middle cerebral artery; mRS = modified Rankin scale; mTICI = modified treatment in cerebral ischemic; NIHSS = National Institutes of Health Stroke Scale; sICH = symptomatic intracerebral haemorrhage.

<sup>†</sup>Excluded patients starting thrombectomy treatment after 6.5 hours from the onset of symptoms. \*only include cases that thrombectomy attempted with access to clot, 402/570. \*\*all cases that had groin puncture were included 374.
